# Supplementary material for: Spatio-temporal variability of micro-, nano- and pico-phytoplankton in the Mediterranean Sea from satellite ocean colour data of SeaWiFS
Source: Copernicus journal article supplement (doi:10.5194/os-11-759-2015), 2015-09-25
Supplement: Supplementary file 1 [file os-11-759-2015-supplement.zip]

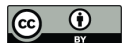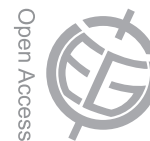

*Supplement of*

## **Spatio-temporal variability of micro-, nano- and pico-phytoplankton in the Mediterranean Sea from satellite ocean colour data of SeaWiFS**

**M. Sammartino et al.**

*Correspondence to:* M. Sammartino ([michela.sammartino@artov.isac.cnr.it](mailto:michela.sammartino@artov.isac.cnr.it))

- [os-11-759-2015-supplement-title-page.pdf](#)
- [supplement\\_material](#)
  - [Fig. 1S\\_a\\_climatology\\_jan\\_apr.png](#)
  - [Fig. 1S\\_b\\_climatology\\_may\\_aug.png](#)
  - [Fig. 1S\\_c\\_climatology\\_sep\\_dec.png](#)

The copyright of individual parts of the supplement might differ from the CC-BY 3.0 licence.
